# Supplementary material for: Protective effects of hydrogen gas inhalation on radiation-induced bone marrow damage in cancer patients: a retrospective observational study
Source: PubMed Central journal article supplement — Med Gas Res. 2021 Apr 27;11(3):104–9. doi: 10.4103/2045-9912.314329 (PMC8174412; doi:10.4103/2045-9912.314329), 2021-04-27
Supplement: MGR-11-104_Suppl1.pdf [file MGR-11-104_Suppl1.pdf]

# 倫理審査結果通知書

2019年2月1日

申請者 青木 幸昌 殿

医療法人社団 ICVS  
ICVS 東京クリニック倫理委員会



倫理委員会で審議した結果、下記のとおり決定しましたので通知いたします。

## 記

|       |                                      |
|-------|--------------------------------------|
| 研究責任者 | 所属：医療法人社団愈光会 Clinic C4<br>氏名：青木 幸昌   |
| 研究課題名 | 放射線照射を受けたがん患者の副作用に及ぼす水素ガス吸入の後方視的観察研究 |

|          |     |                                                                                                                                                                                                                            |
|----------|-----|----------------------------------------------------------------------------------------------------------------------------------------------------------------------------------------------------------------------------|
| 指示・決定の内容 | 事項  | <input type="checkbox"/> 基礎医学研究 <input checked="" type="checkbox"/> 治療研究                                                                                                                                                   |
|          | 判定  | <input type="checkbox"/> 承認 <input type="checkbox"/> 修正した上で承認 <input checked="" type="checkbox"/> 条件付承認<br><input type="checkbox"/> 不承認 <input type="checkbox"/> 保留（継続審査）<br><input type="checkbox"/> 中止（研究・治療等の継続は適当ではない） |
|          | 条件等 | 調査期間において対象となる全症例を調査すること                                                                                                                                                                                                    |
